# Supplementary material for: Identification of Differentially Expressed Micrornas Associate with Glucose Metabolism in Different Organs of Blunt Snout Bream (Megalobrama amblycephala)
Source: MDPI journal article supplement (doi:10.3390/ijms18061161), 2017-05-31
Supplement: s1 [file s1]

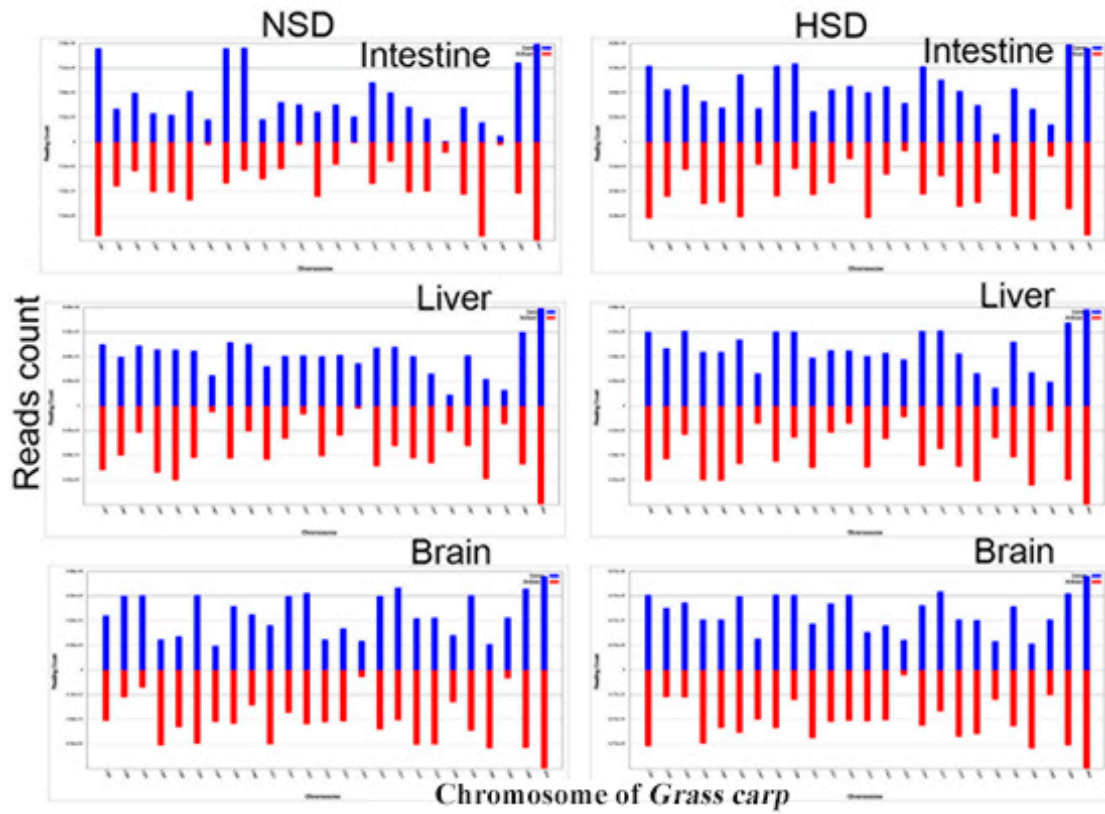

**Figure S4. Number and distribution of clean reads mapped to the genome sequence of grass carp.** The number of sRNAs on the sense strand of chromosome was shown in blue, whereas the number of sRNAs on the antisense strand of chromosome was shown in red.
