# Supplementary material for: Identification of Differentially Expressed Micrornas Associate with Glucose Metabolism in Different Organs of Blunt Snout Bream (Megalobrama amblycephala)
Source: MDPI journal article supplement (doi:10.3390/ijms18061161), 2017-05-31
Supplement: s1 [file s1]

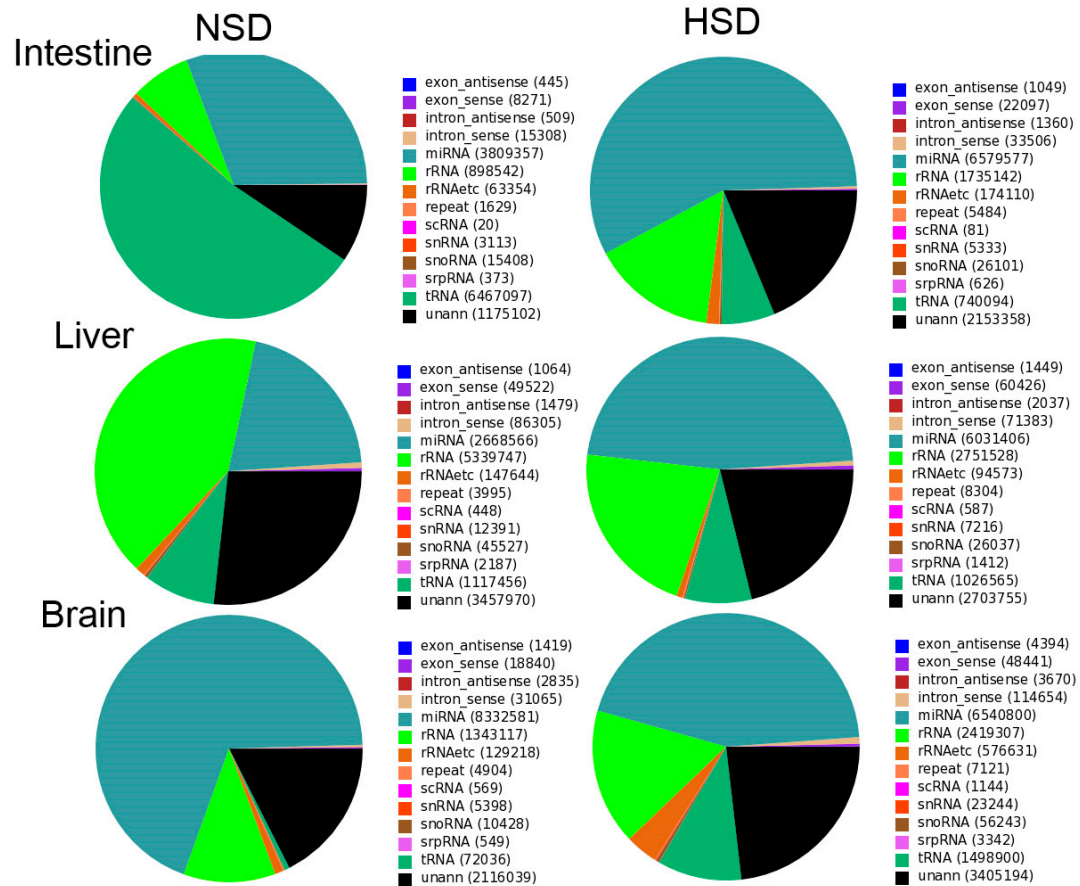

**Figure S3. Annotation of total small RNAs derived from Illumina sequencing of *M. amblycephala* small RNAs libraries.**
