# Supplementary material for: Identification of Differentially Expressed Micrornas Associate with Glucose Metabolism in Different Organs of Blunt Snout Bream (Megalobrama amblycephala)
Source: MDPI journal article supplement (doi:10.3390/ijms18061161), 2017-05-31
Supplement: s1 [file s1]

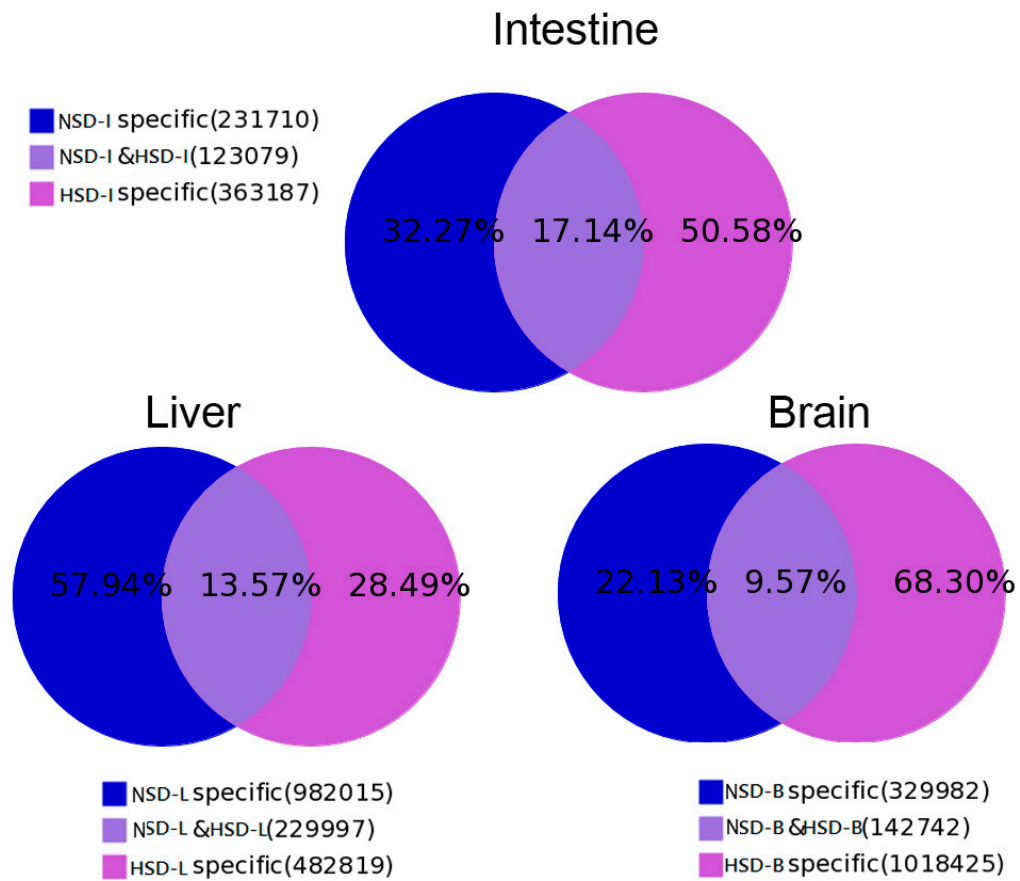

**Figure S2. Venn chart for commonly and specific expressed unique small RNAs sequences in different tissues of *M. amblycephala* fed with normal (NSD) and high starch diet (HSD).**
