# Supplementary material for: Identification of Differentially Expressed Micrornas Associate with Glucose Metabolism in Different Organs of Blunt Snout Bream (Megalobrama amblycephala)
Source: MDPI journal article supplement (doi:10.3390/ijms18061161), 2017-05-31
Supplement: s1 [file s1]

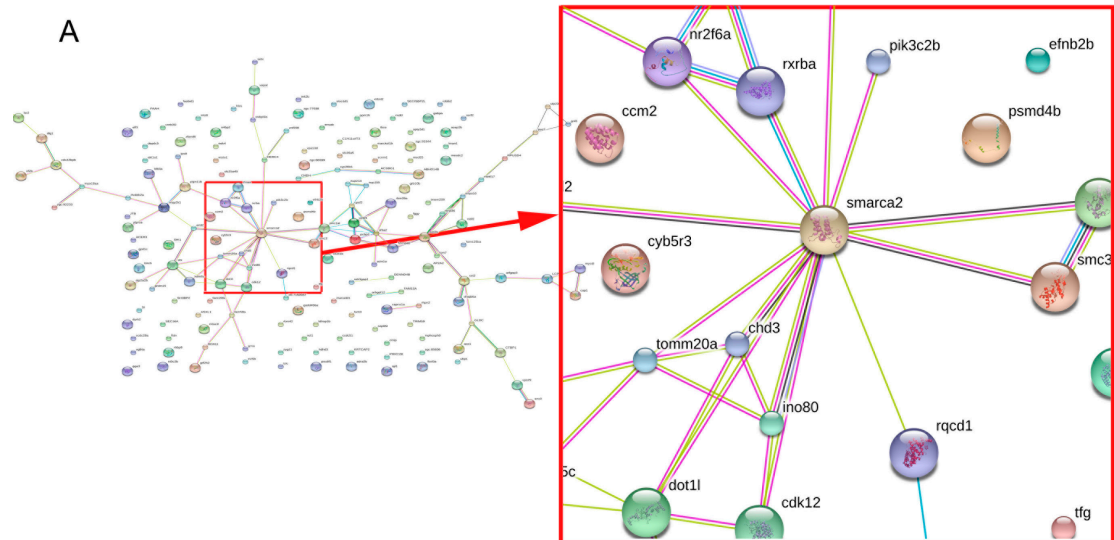

mam-miR-22b-3p

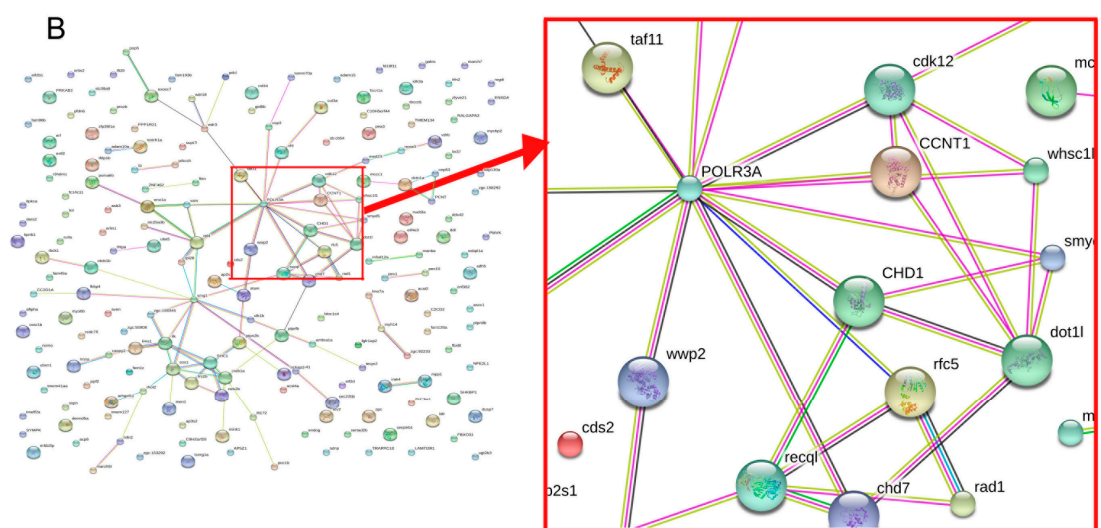

mam-miR-20a-3p

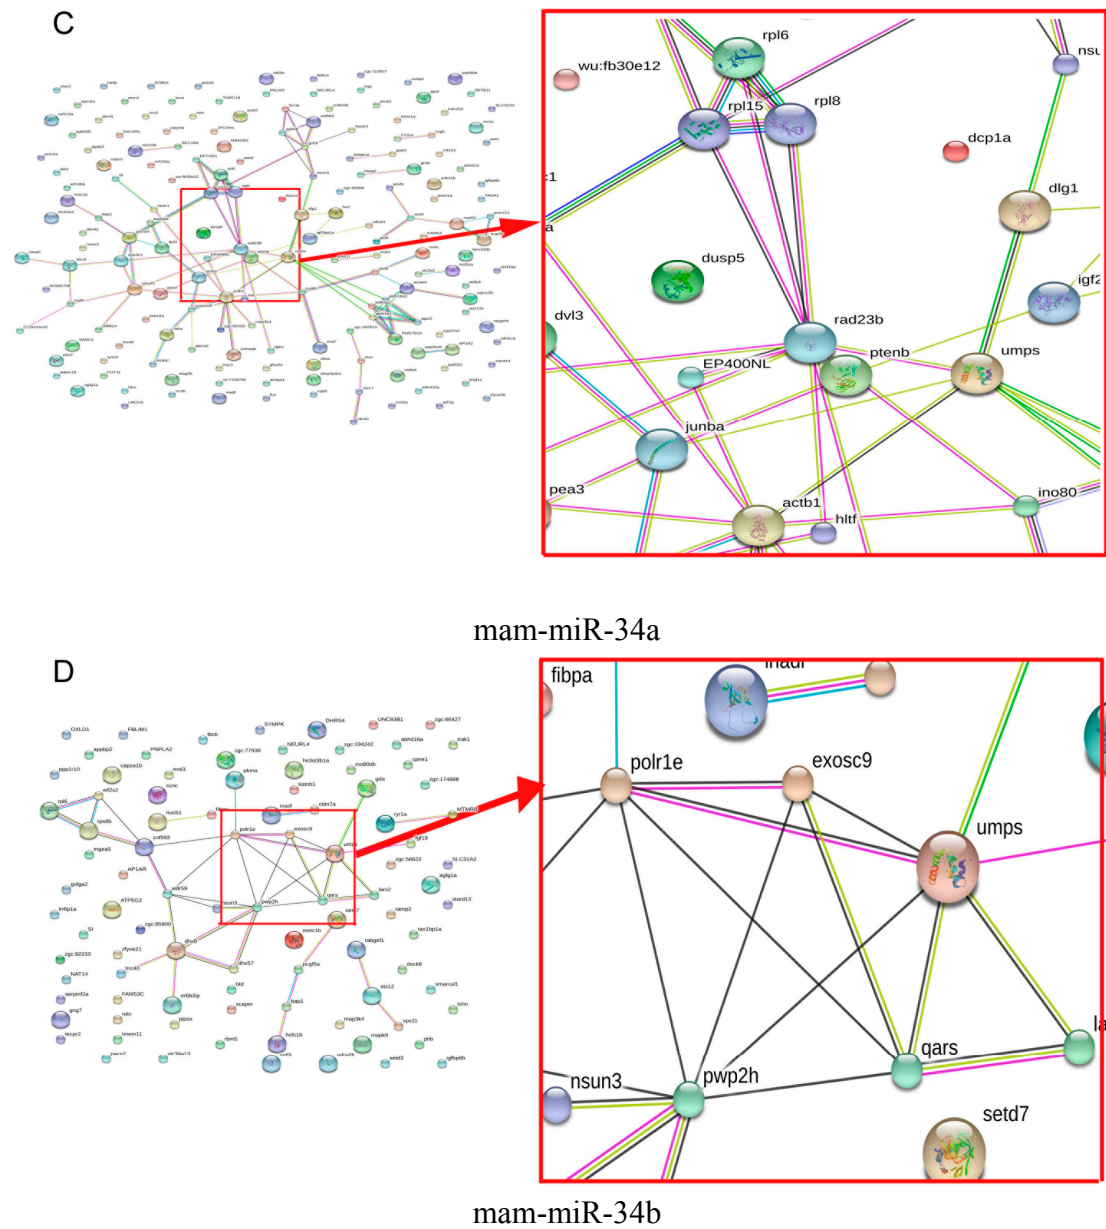

**Figure S8. Protein-protein interaction (PPI) networks for the predicted targets of differentially expressed miRNAs in *M. amblycephala*.**
