# Supplementary figures and images for: Identification of Differentially Expressed Micrornas Associate with Glucose Metabolism in Different Organs of Blunt Snout Bream (Megalobrama amblycephala)
Source: MDPI journal article supplement (doi:10.3390/ijms18061161), 2017-05-31

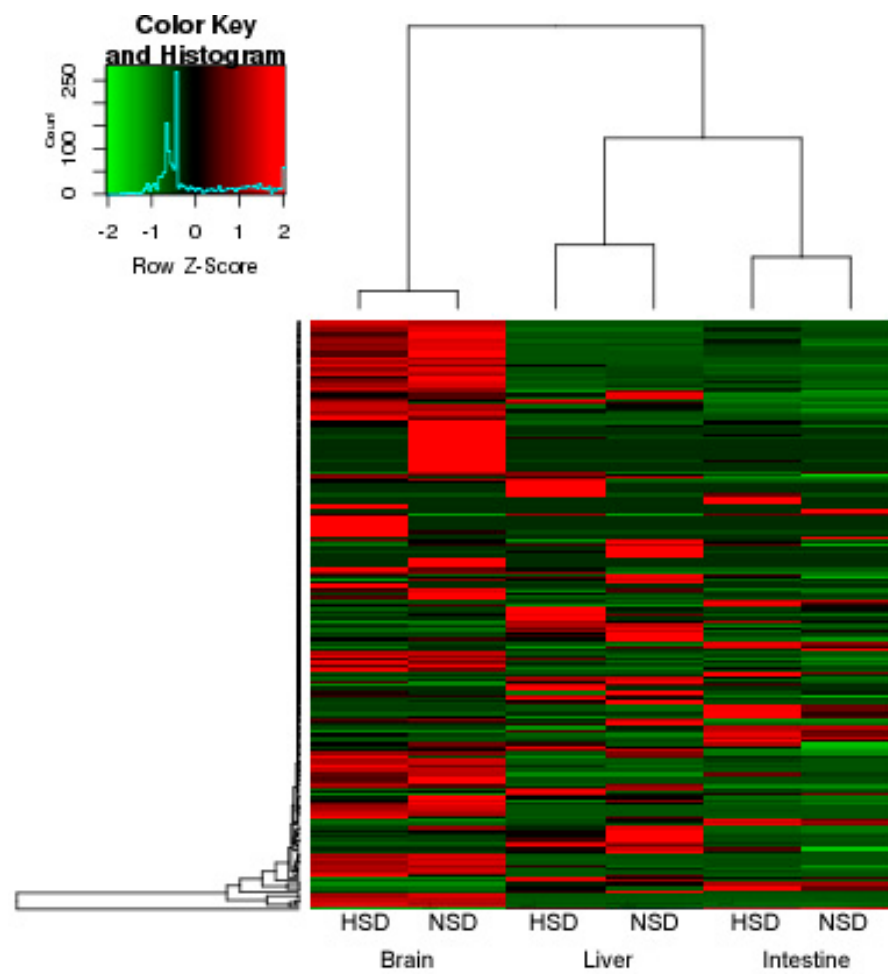

**Figure S7. Clustering analyses for differentially expressed miRNAs in *M. amblycephala*.**

Supplement: s1 [file s1]

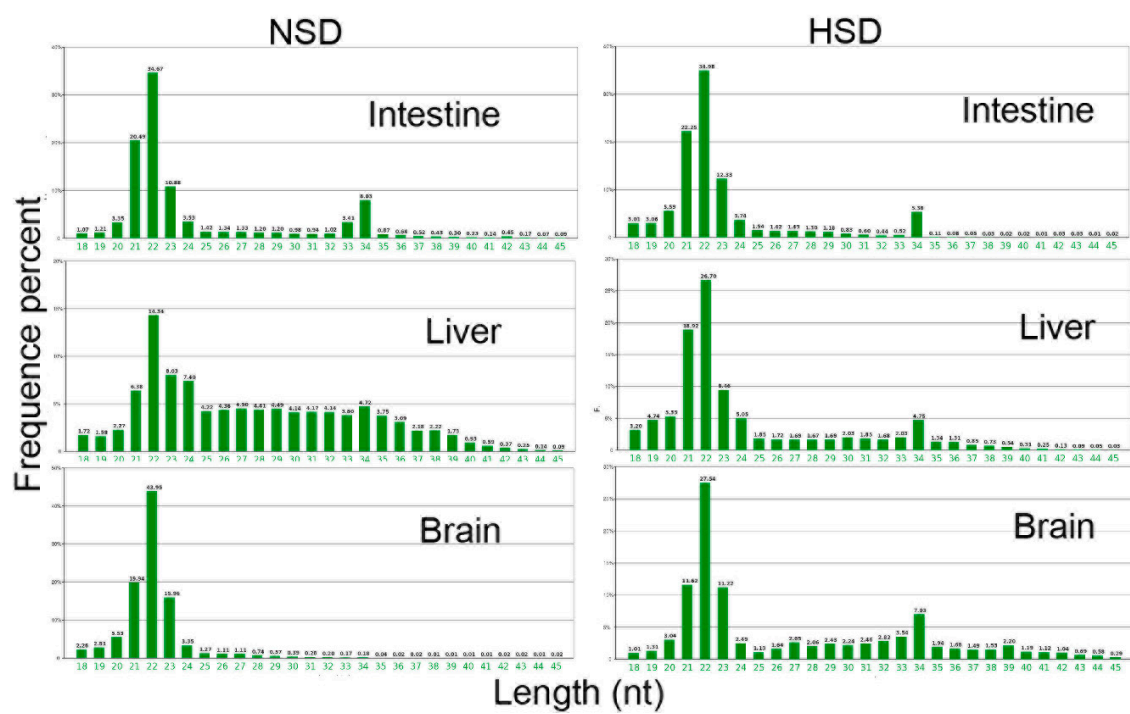

**Figure S1: Length distribution of small RNAs in six libraries clean reads.**

Supplement: s1 [file s1]
